# Supplementary material for: The Mutational Landscape of SARS-CoV-2
Source: MDPI journal article supplement (doi:10.3390/ijms24109072), 2023-05-22
Supplement: s1 [file s1]

## **Supplementary Information for The mutational landscape of SARS-CoV-2**

**Bryan Saldivar-Espinoza<sup>1†</sup>, Pol Garcia-Segura<sup>1</sup>, Nil Novau-Ferré<sup>1†</sup>, Guillem Macip<sup>1</sup>,  
Ruben Martinez<sup>2</sup>, Pere Puigbò<sup>3,4,5</sup>, Adrià Cereto-Massagué<sup>6</sup>, Gerard Pujadas<sup>1,\*</sup> and  
Santiago Garcia-Vallve<sup>1,\*</sup>**

<sup>1</sup> Departament de Bioquímica i Biotecnologia, Research group in Cheminformatics & Nutrition, Campus de Sescelades, Universitat Rovira i Virgili, 43007 Tarragona, Spain; bsaldivar.emc2@gmail.com (B.S.-E.); polgarse2@gmail.com (P.G.-S.); nnovauf@gmail.com (N.N.-F.); guillem.macip@gmail.com (G.M.)

<sup>2</sup> Institut La Guineueta. 08042 Barcelona, Spain; rmartbernabe@gmail.com

<sup>3</sup> Department of Biology, University of Turku, 20500 Turku, Finland; pepuav@utu.fi

<sup>4</sup> Department of Biochemistry and Biotechnology, Rovira i Virgili University, 43007 Tarragona, Spain

<sup>5</sup> Eurecat Technology Centre of Catalonia, Unit of Nutrition and Health, 43204 Reus, Spain

<sup>6</sup> EURECAT Centre Tecnològic de Catalunya, Centre for Omic Sciences (COS), Joint Unit Universitat Rovira i Virgili-EURECAT, Unique Scientific and Technical Infrastructures (ICTS), 43204 Reus, Spain. ssorgatem@gmail.com

### **This PDF file includes:**

Figures S1 to S14

Tables S1 to S3

**Figure S1.** Bar chart of the percentage of analyzed genomes sequenced for each country.

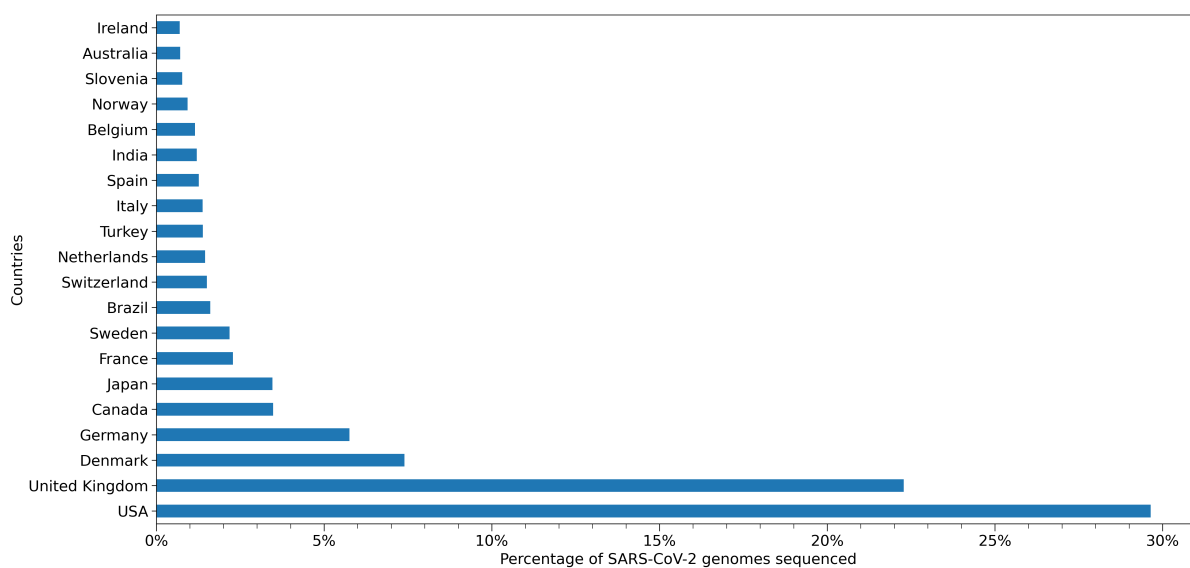

**Figure S2.** Mean number of SNVs per genome and week.

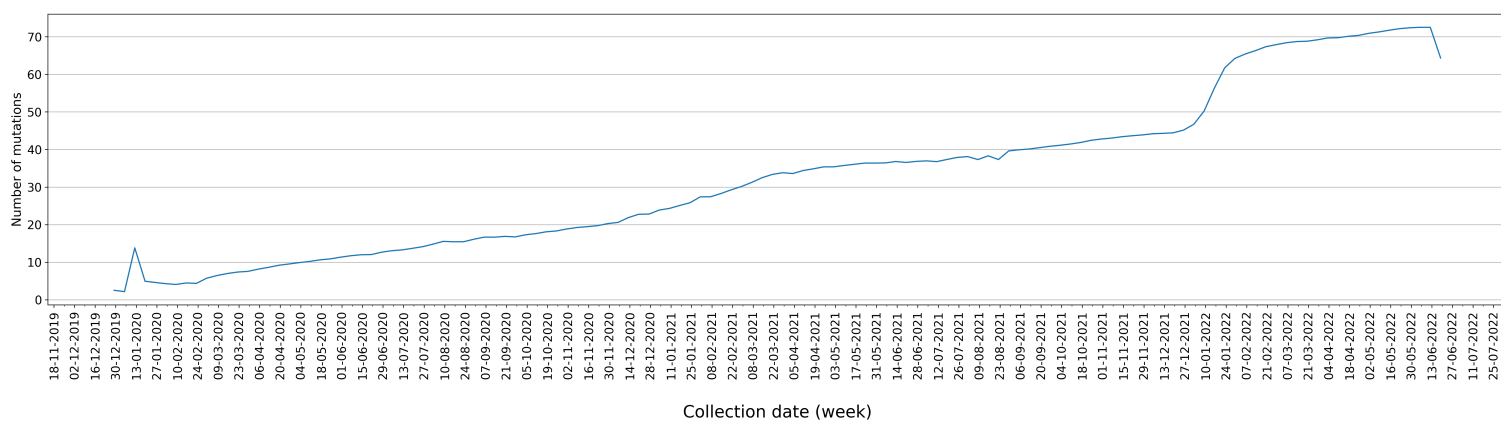

**Figure S3.** Mean number of deletions per genome and week.

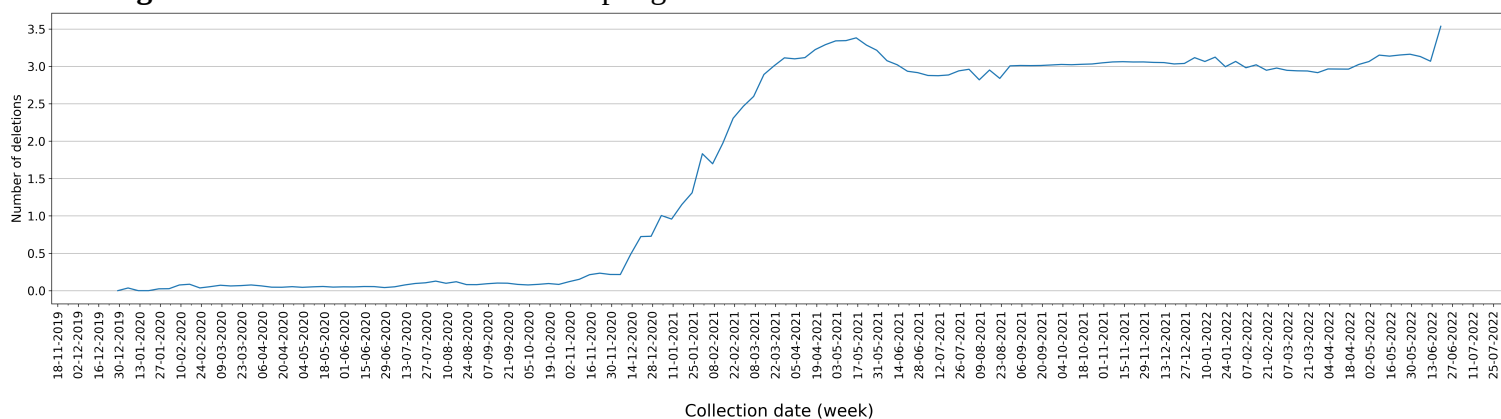

**Figure S4.** Mean number of insertions per genome and week.

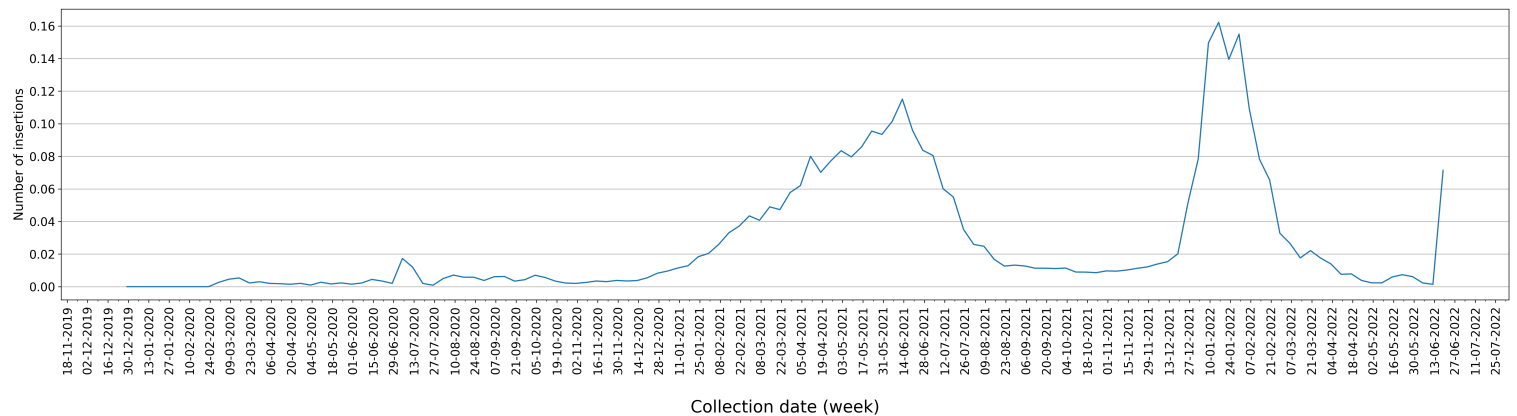

**Figure S5.** Histogram of the length of deletions in SARS-CoV-2 genomes. Only deletions with a relative frequency greater than 10% were analyzed.

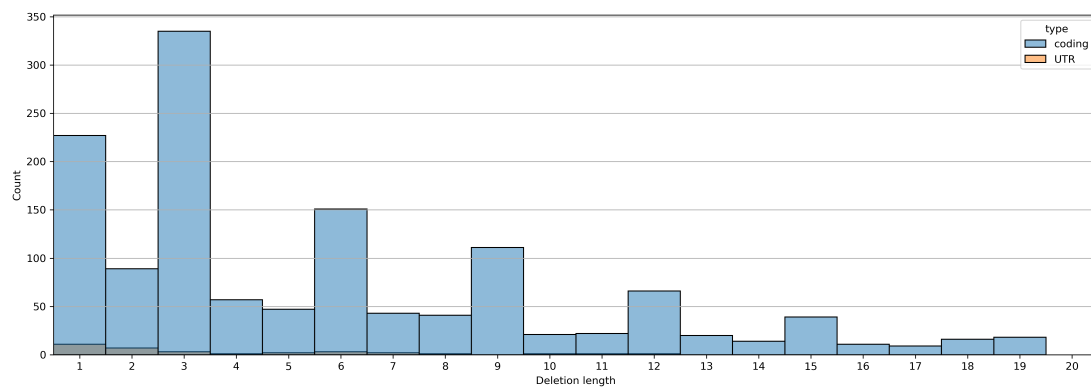

**Figure S6.** Histogram of the length of insertions in SARS-CoV-2 genomes. Only deletions with a relative frequency greater than 10% were analyzed.

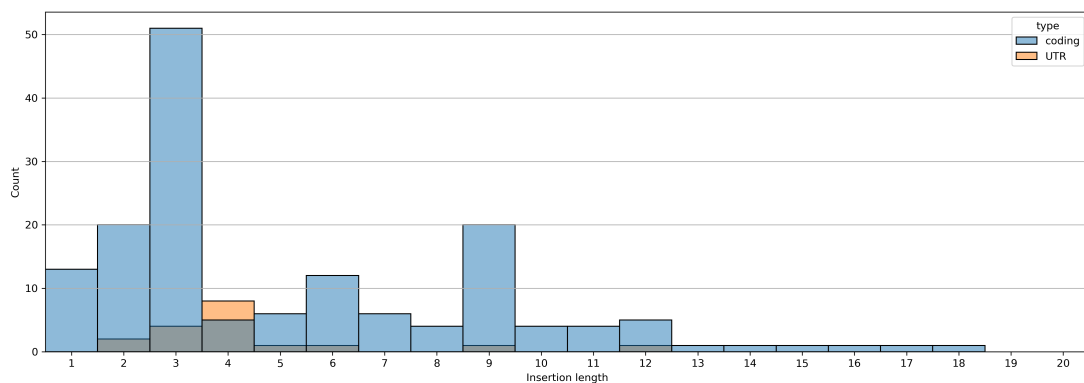

**Figure S7.** Box plots of the relative frequency of SNV types.

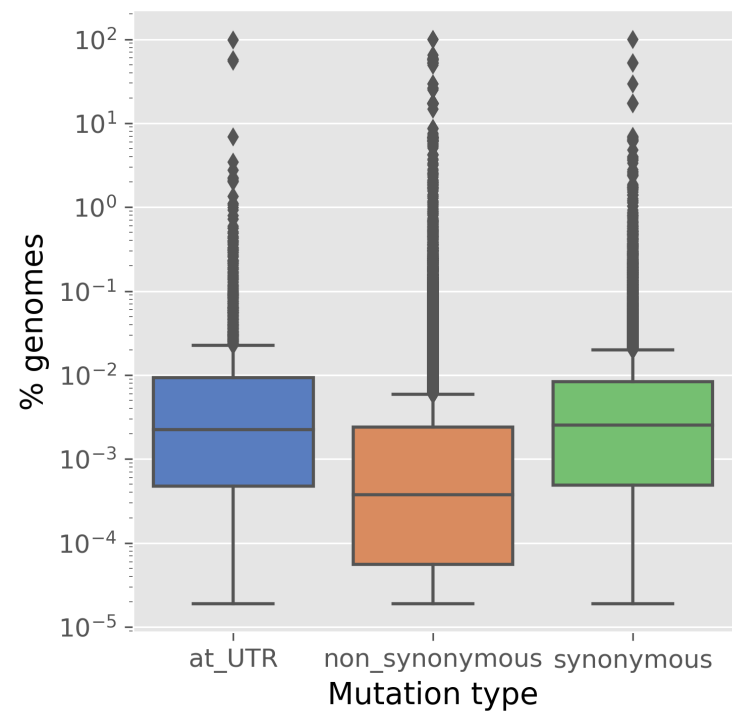

**Figure S8.** Histogram of the percentage of SNVs found in a given number of genomes.

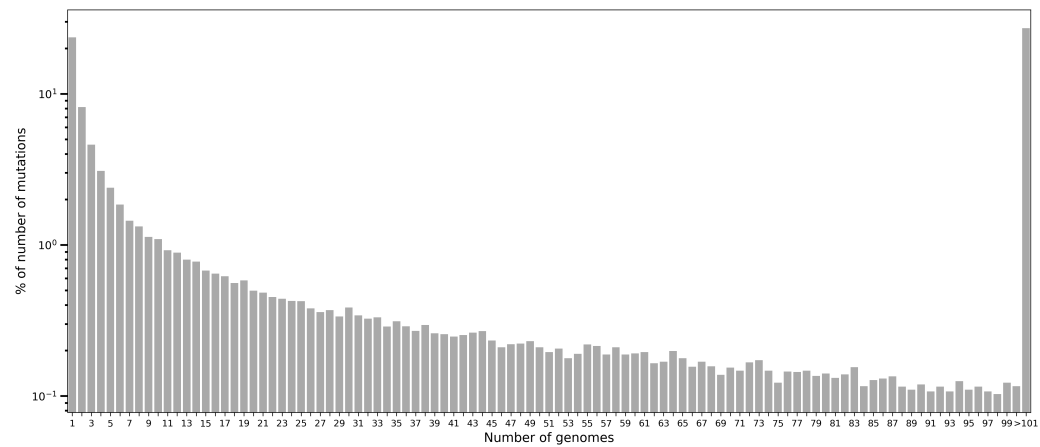

**Figure S9.** Lolliplots of the most frequent mutations in each SARS-CoV-2 gene. Synonymous, non-synonymous and UTR mutations are shown in green, dark orange and blue, respectively. Deletions are shown in purple.

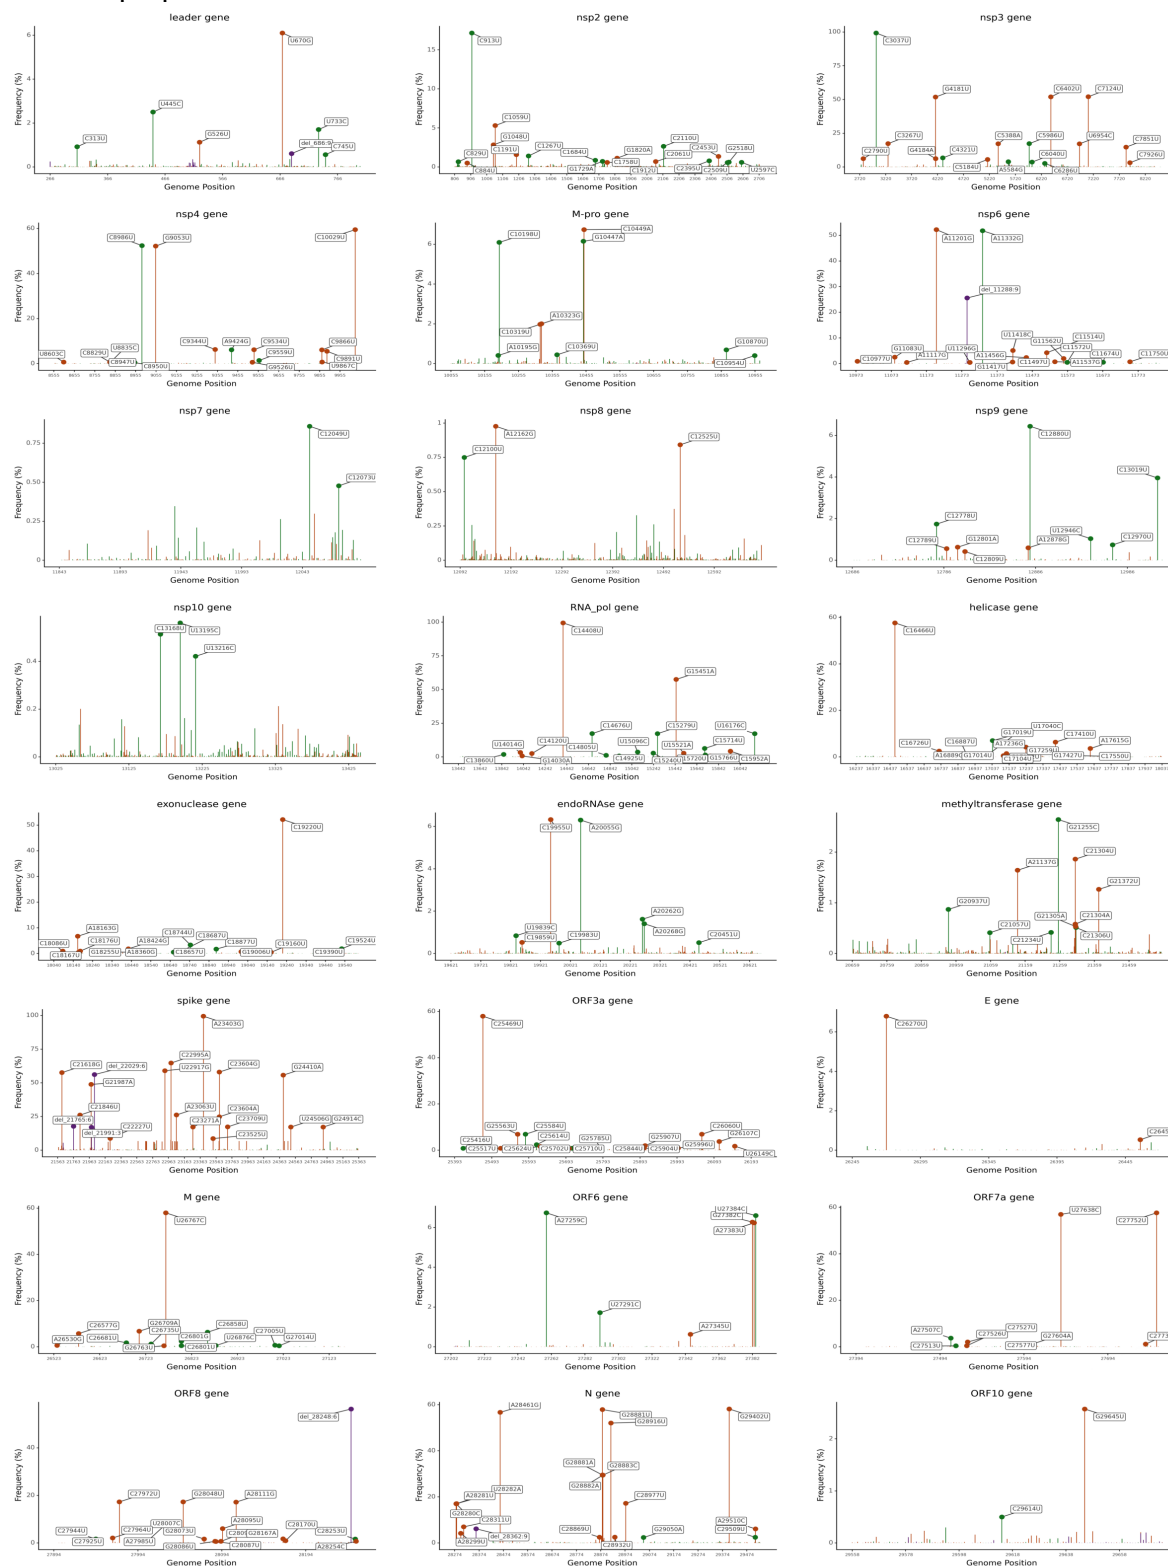

**Figure S10.** Box plots of the frequency (A), number of pangolin lineages (B), number of countries (C) and number of variants (D) of SNV types.

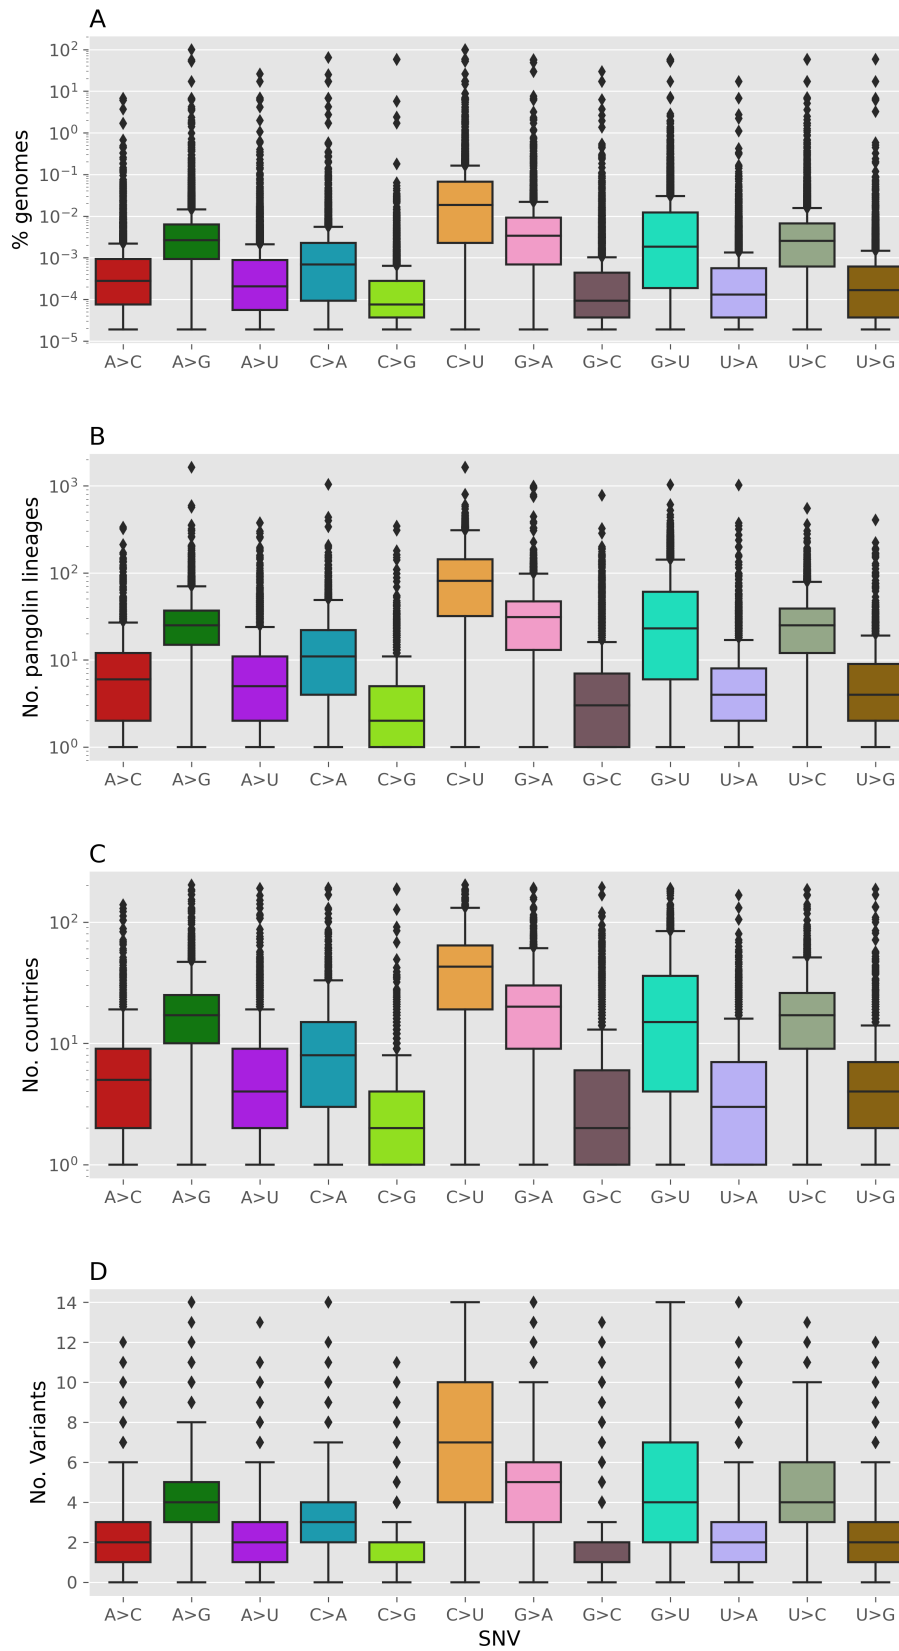

**Figure S11.** Box plots of the frequency (%) of the mutations found in SARS-CoV-2 regions that hybridize with probes and forward and reverse primers from some COVID-19 diagnostic PCR tests.

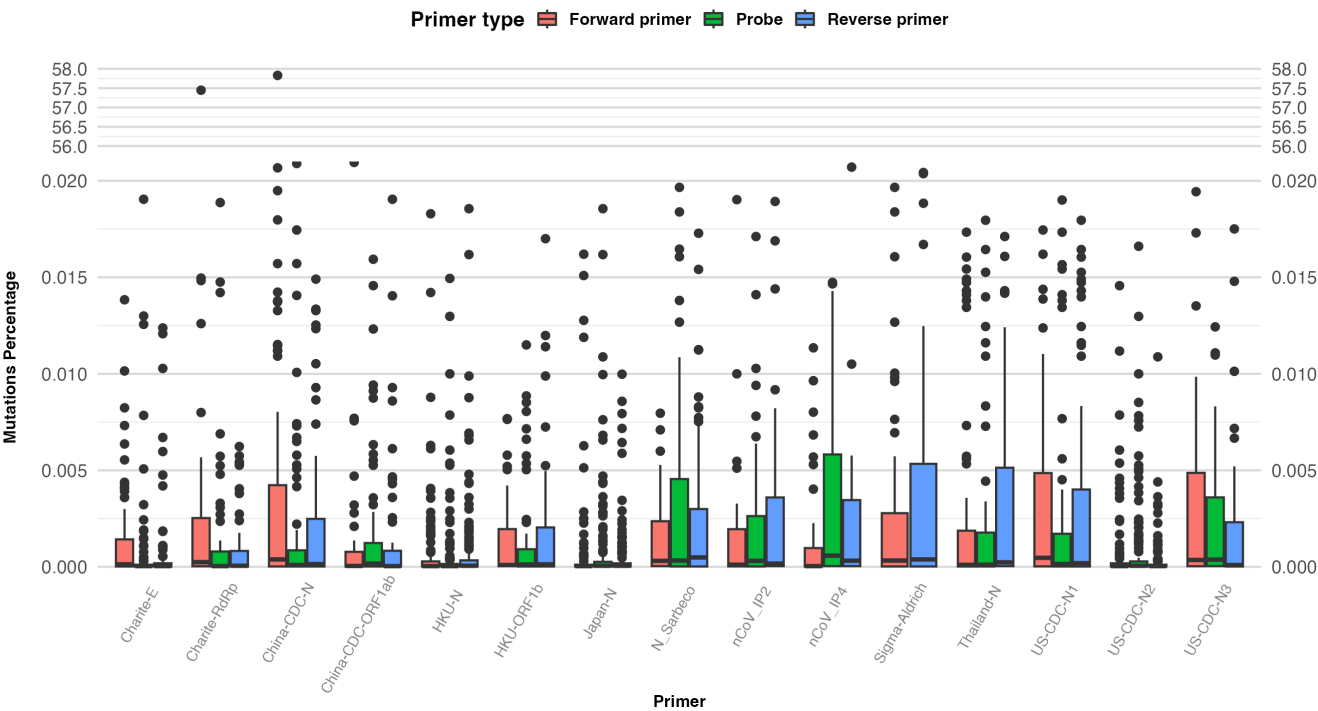

Figure S12. Search engine of the SARS-CoV-2 mutation portal at <http://sarscov2-mutation-portal.urv.cat/>

SARS-CoV-2 mutation portal

Home

Info

About

Genes

Mutations

Enabled by data from 

Search filter

Select your gene:

All

Select your countries:

All

Select your Mutation type:

All

Select your Percentage found:

All

VOC:

All

search

Date first found

date from:

dd / mm / aaaa

date to:

dd / mm / aaaa

Date Last found

date from:

dd / mm / aaaa

date to:

dd / mm / aaaa



Figure S13. Results of a search of the SARS-CoV-2 mutation portal at <http://sarscov2-mutation-portal.urv.cat/>

SARS-CoV-2 mutation portal

dd/mm/yyyy

HomeInfoAboutGenesMutationsEnabled by data from

Show 10 entries

Search:

| mutation | position | gene   | mut type   | codon     | aa    | codon position | num found | percentage found | n countries | date first found | id first found   |
|----------|----------|--------|------------|-----------|-------|----------------|-----------|------------------|-------------|------------------|------------------|
| G204T    | 204      | 5_UTR  | at_UTR     |           |       |                | 72122     | 1.35046          | 98          | 2020-03-02       | EPI_ISL_2013149  |
| G210T    | 210      | 5_UTR  | at_UTR     |           |       |                | 3063257   | 57.35825         | 187         | 2020-03-03       | EPI_ISL_2758215  |
| C241T    | 241      | 5_UTR  | at_UTR     |           |       |                | 5231432   | 97.95645         | 202         | 2020-01-01       | EPI_ISL_4405694  |
| T445C    | 445      | leader | synonymous | GTT60GTC  | V60V  | 3              | 133531    | 2.50031          | 92          | 2020-02-14       | EPI_ISL_1014733  |
| G526T    | 526      | leader | missense   | GAG87GAT  | E87D  | 3              | 60108     | 1.1255           | 103         | 2020-03-02       | EPI_ISL_10431154 |
| T670G    | 670      | leader | missense   | AGT135AGG | S135R | 3              | 325823    | 6.1009           | 109         | 2020-03-28       | EPI_ISL_12269393 |
| T733C    | 733      | leader | synonymous | GAT156GAC | D156D | 3              | 91013     | 1.70418          | 86          | 2020-04-23       | EPI_ISL_2612488  |
| C913T    | 913      | nsp2   | synonymous | TCC36TCT  | S36S  | 3              | 915334    | 17.13926         | 169         | 2020-03-12       | EPI_ISL_2898105  |
| G1048T   | 1048     | nsp2   | missense   | AAG81AAT  | K81N  | 3              | 151117    | 2.82961          | 140         | 2020-05-11       | EPI_ISL_6463150  |
| C1059T   | 1059     | nsp2   | missense   | ACC85ATC  | T85I  | 2              | 282636    | 5.29225          | 160         | 2020-01-01       | EPI_ISL_4405694  |

Showing 1 to 10 of 247 entries

Previous12345...

Figure S14. Scatter plot of the above search

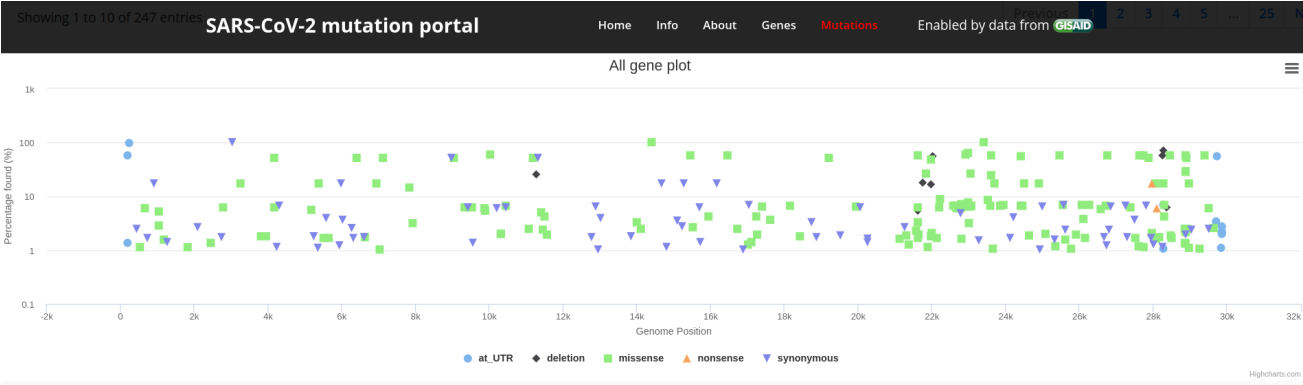

**Table S1.** Distribution by continent of the 5,340,569 SARS-CoV-2 genomes analyzed.

| Continent     | Genomes sequenced | Percentage (%) |
|---------------|-------------------|----------------|
| Europe        | 2,942,990         | 55.1           |
| North America | 1,819,981         | 34.1           |
| Asia          | 371,704           | 7.0            |
| South America | 126,872           | 2.4            |
| Oceania       | 44,942            | 0.8            |
| Africa        | 34,080            | 0.6            |

**Table S2.** Number of different SNVs, insertions and deletions found in the 5,340,569 SARS-CoV-2 genomes analyzed.

| Mutation   | Total number <sup>1</sup> | Coding regions | UTRs |
|------------|---------------------------|----------------|------|
| SNVs       | 73,464                    | 71,622         | 1842 |
| deletions  | 21,712                    | 21,464         | 248  |
| insertions | 1820                      | 1700           | 120  |

<sup>1</sup>Number of different SNV, deletions or insertions

**Table S3.** Mutations found in SARS-CoV-2 regions that hybridize with probes and forward and reverse primers from some COVID-19 diagnostic PCR tests.

| Name             | Gene   | Forward primer position | Forward primer count <sup>2</sup> | Forward primer % <sup>1</sup> | Forward primer 5 last count <sup>2,3</sup> | Forward primer 5 last % <sup>1,3</sup> | Reverse primer position | Reverse primer count <sup>2</sup> | Reverse primer % <sup>1</sup> | Reverse primer 5 last count <sup>2,3</sup> | Reverse primer 5 last % <sup>1,3</sup> | Probe position | Probe count <sup>2</sup> | Probe % <sup>1</sup> | Total count | Total % <sup>1</sup> |
|------------------|--------|-------------------------|-----------------------------------|-------------------------------|--------------------------------------------|----------------------------------------|-------------------------|-----------------------------------|-------------------------------|--------------------------------------------|----------------------------------------|----------------|--------------------------|----------------------|-------------|----------------------|
| nCoV_IP2         | RdRp   | 12,690-12,707           | 46 (5 0)                          | 0.07                          | 14 (1 0)                                   | 0.039                                  | 12,780-12,797           | 68 (13 2)                         | 1.25                          | 18 (5 1)                                   | 0.14                                   | 12,717-12,737  | 64 (12 0)                | 0.44                 | 178         | 1.75                 |
| nCoV_IP4         | RdRp   | 14,080-14,098           | 50 (10 0)                         | 0.12                          | 13 (3 0)                                   | 0.068                                  | 14,167-14,186           | 66 (6 0)                          | 0.85                          | 15 (2 0)                                   | 0.038                                  | 14,105-14,123  | 65 (4 1)                 | 2.97                 | 181         | 3.94                 |
| Charite-E        | E      | 26,269-26,294           | 89 (16 0)                         | 6.91                          | 15 (5 0)                                   | 0.018                                  | 26,360-26,381           | 81 (22 1)                         | 0.10                          | 30 (15 1)                                  | 0.003                                  | 26,332-26,357  | 143 (32 0)               | 0.14                 | 313         | 7.15                 |
| N_Sarbeco        | N      | 28,706-28,724           | 68 (8 0)                          | 0.87                          | 22 (5 0)                                   | 0.23                                   | 28,814-28,833           | 93 (18 0)                         | 0.75                          | 34 (14 0)                                  | 0.17                                   | 28,753-28,777  | 116 (23 3)               | 0.52                 | 277         | 2.14                 |
| Charite-RdRp     | RdRp   | 15,431-15,452           | 67 (10 0)                         | 57.85                         | 24 (5 0)                                   | 57.57                                  | 15,505-15,528           | 52 (9 0)                          | 2.76                          | 15 (6 0)                                   | 0.01                                   | 15,470-15,494  | 64 (15 0)                | 0.23                 | 183         | 60.84                |
| HKU-ORF1b        | ORF1ab | 18,778-18,797           | 60 (3 0)                          | 0.31                          | 11 (0 0)                                   | 0.07                                   | 18,889-18,909           | 73 (13 0)                         | 0.70                          | 19 (3 0)                                   | 0.14                                   | 18,849-18,872  | 60 (5 0)                 | 0.17                 | 193         | 1.18                 |
| HKU-N            | N      | 29,145-29,166           | 145 (79 0)                        | 0.59                          | 93 (77 0)                                  | 0.08                                   | 29,236-29,254           | 222 (151 0)                       | 1.95                          | 154 (136 0)                                | 0.16                                   | 29,177-29,196  | 167 (104 1)              | 0.71                 | 534         | 3.25                 |
| China-CDC-ORF1ab | ORF1ab | 13,342-13,362           | 58 (11 1)                         | 0.27                          | 12 (4 0)                                   | 0.009                                  | 13,442-13,460           | 59 (13 0)                         | 0.24                          | 16 (6 0)                                   | 0.04                                   | 13,377-13,404  | 103 (21 1)               | 0.29                 | 220         | 0.79                 |
| China-CDC-N      | N      | 28,881-28,902           | 156 (35 3)                        | 120.51                        | 48 (23 2)                                  | 0.26                                   | 28,958-28,979           | 118 (23 4)                        | 20.42                         | 30 (13 0)                                  | 0.56                                   | 28,934-28,953  | 86 (20 2)                | 0.35                 | 360         | 141.28               |
| US-CDC-N1        | N      | 28,287-28,306           | 102 (15 4)                        | 5.29                          | 26 (7 0)                                   | 0.06                                   | 28,335-28,358           | 111 (23 2)                        | 0.56                          | 29 (10 1)                                  | 0.11                                   | 28,309-28,332  | 131 (25 2)               | 8.75                 | 344         | 14.59                |
| US-CDC-N2        | N      | 29,164-29,183           | 154 (92 1)                        | 1.11                          | 104 (90 1)                                 | 0.50                                   | 29,213-29,230           | 184 (131 0)                       | 0.66                          | 129 (117 0)                                | 0.13                                   | 29,188-29,210  | 189 (115 0)              | 0.95                 | 527         | 2.73                 |
| US-CDC-N3        | N      | 28,681-28,702           | 88 (14 0)                         | 0.96                          | 22 (7 0)                                   | 0.11                                   | 28,732-28,752           | 91 (17 2)                         | 0.75                          | 25 (8 0)                                   | 0.15                                   | 28,704-28,727  | 90 (10 0)                | 1.64                 | 269         | 3.36                 |
| Japan-N          | N      | 29,125-29,144           | 116 (63 0)                        | 0.52                          | 77 (60 0)                                  | 0.35                                   | 29,263-29,282           | 234 (173 0)                       | 0.92                          | 174 (159 0)                                | 0.24                                   | 29,222-29,241  | 211 (140 0)              | 0.59                 | 561         | 2.02                 |
| Thailand-N       | N      | 28,320-28,339           | 104 (21 2)                        | 1.25                          | 27 (8 1)                                   | 0.09                                   | 28,358-28,376           | 112 (29 0)                        | 0.82                          | 35 (17 0)                                  | 0.17                                   | 28,341-28,356  | 78 (18 1)                | 0.39                 | 294         | 2.46                 |
| Sigma-Aldrich    | N      | 28,750-28,771           | 96 (18 1)                         | 0.39                          | 26 (11 0)                                  | 0.10                                   | 28,842-28,860           | 96 (17 2)                         | 2.27                          | 30 (8 0)                                   | 0.14                                   | -              | 0                        | 0                    | 192         | 2.66                 |

<sup>1</sup>Total accumulated frequencies in %. <sup>2</sup>The numbers in brackets indicate the number of deletions and insertions. <sup>3</sup>Only the last 5 bases of the 3'-end have been taken into account
